# Supplementary material for: SMAD4 represses FOSL1 expression and pancreatic cancer metastatic colonization
Source: PubMed Central journal article supplement — Cell Rep. Author manuscript; Available in PMC 2021 Aug 9. (PMC8350598; doi:10.1016/j.celrep.2021.109443), 2021-07-27
Supplement: NIHMS1728503-supplement-Data_S1-S4.pdf [file NIHMS1728503-supplement-Data_S1-S4.pdf]

**Supplemental information**

**SMAD4 represses FOSL1 expression and  
pancreatic cancer metastatic colonization**

**Chao Dai, Jonathan P. Rennhack, Taylor E. Arnoff, Maneesha Thaker, Scott T. Younger, John G. Doench, August Yue Huang, Annan Yang, Andrew J. Aguirre, Belinda Wang, Evan Mun, Joyce T. O'Connell, Ying Huang, Katherine Labella, Jessica A. Talamas, Ji Li, Nina Ilic, Justin Hwang, Andrew L. Hong, Andrew O. Giacomelli, Ole Gjoerup, David E. Root, and William C. Hahn**

## Extended Data 1

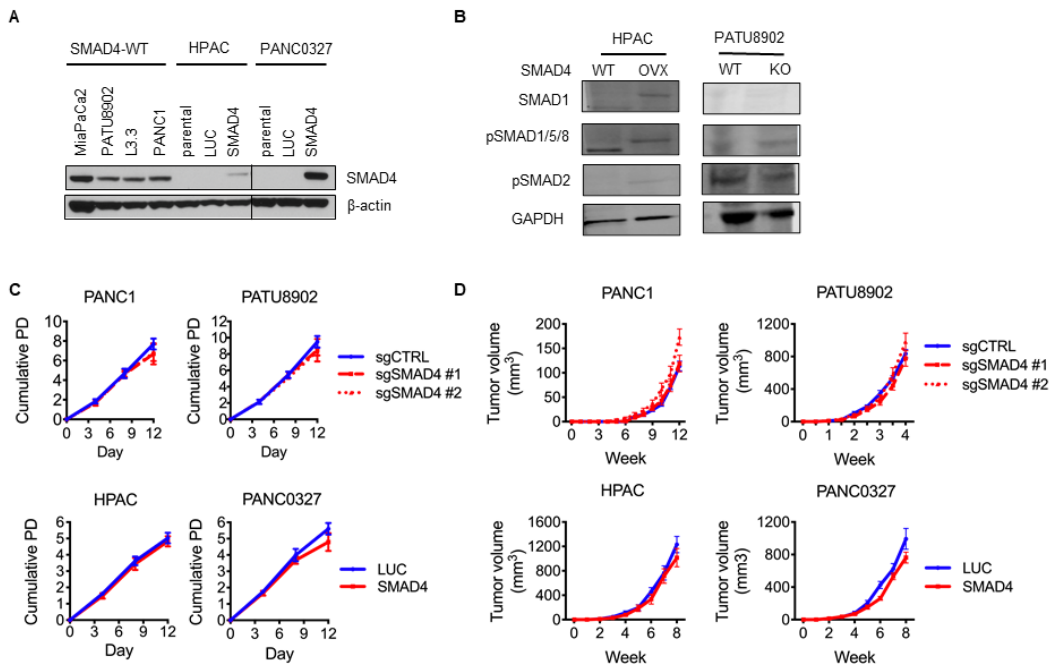

## Extended Data 1: SMAD4 manipulation alters molecular signaling but not growth rate of cell lines

Related to Figure 1

- Immunoblot of exogenous expression of SMAD4 in *SMAD4*-null PDA cell lines (HPAC and PANC0327) compared to SMAD4 expression levels in *SMAD4*-WT PDAC cell lines.
- Immunoblots of SMAD family members in *SMAD4* overexpression line (left) and KO line (right)
- In vitro* growth rate of SMAD4 loss (top) or overexpression (bottom) (n=3, standard deviation is reported in error bars)
- Subcutaneous tumor growth rate for SMAD4 loss (top) or overexpression (bottom) (n=5, standard deviation is reported in error bars)

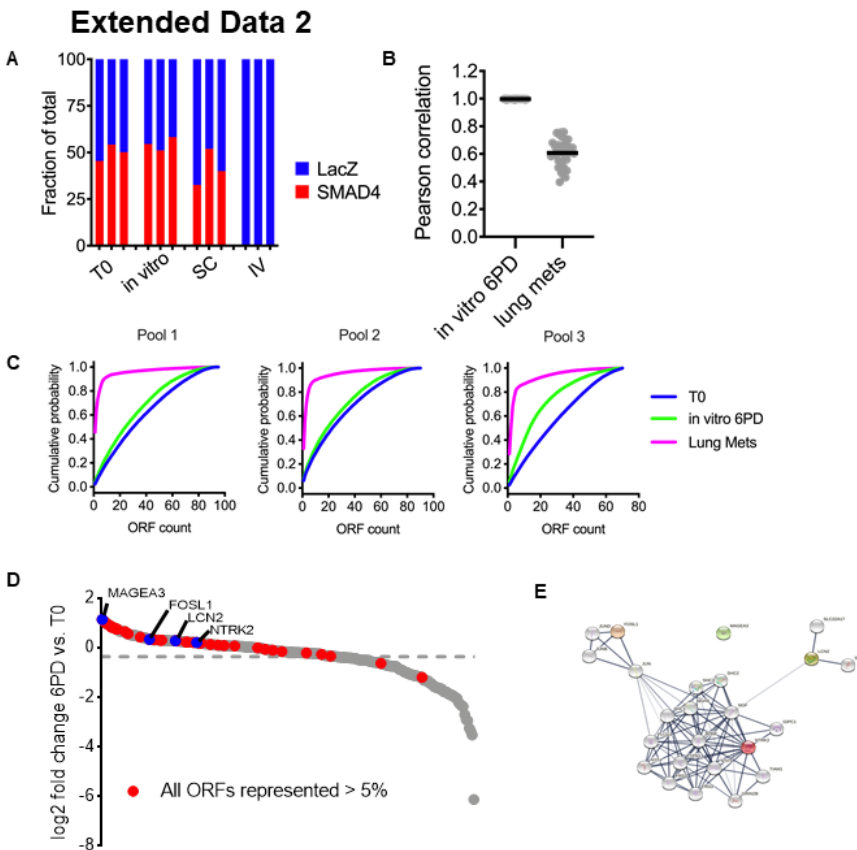

### Extended Data 2: Bias is not reported in guide abundance

Related to Figure 2

- Competition of LacZ- and SMAD4-expressing HPAC cells *in vitro* and *in vivo*. LacZ- and SMAD4- expressing HPAC cells are barcoded and mixed 1:1 and co-cultured *in vitro*, or the mixture was implanted subcutaneously or injected IV in NCr nude mice for *in vitro* and *in vivo* competition. Relative abundance of barcodes was quantified 4 weeks following competition. Three biological replicates are shown for each condition.
- NxN Pearson correlation of ORF representation in *in vitro* proliferation sample and in lung metastases.
- Cumulative distribution of ORFs in each sub-pool for pre-injection cell pellet, *in vitro* proliferation sample, and lung metastases.
- $\log_2$  fold change of ORF representation in *in vitro* proliferation sample vs. pre-injection cell pellet.
- STRING-Db network of target genes (colored nodes) and 20 closest neighbor nodes (grey)

## Extended Data 3

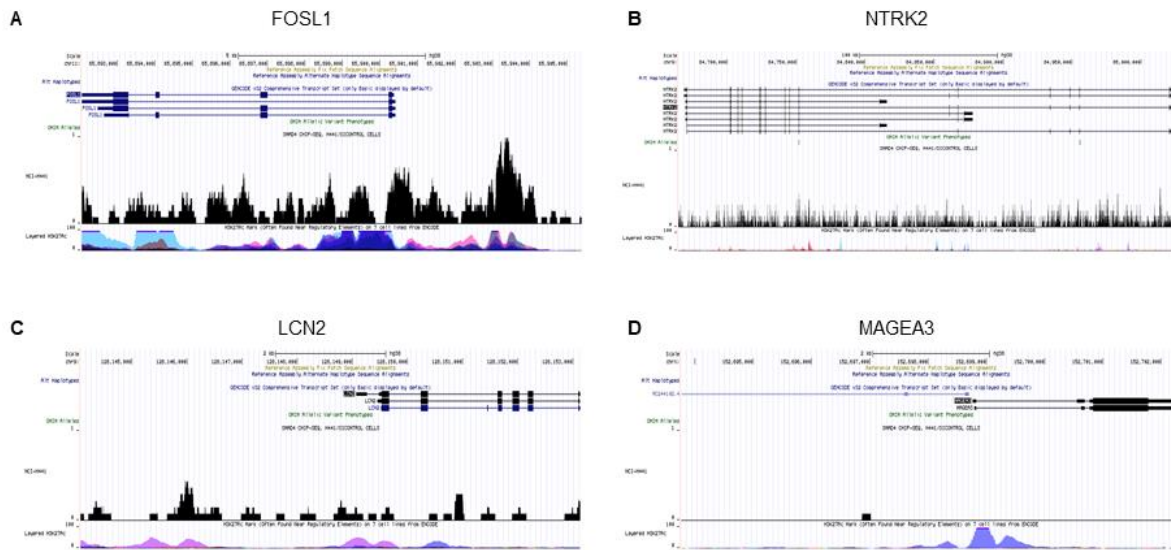

## Extended Data 3: SMAD4 binds the FOSL1 gene locus

*Related to Figure 3*

SMAD4 ChIP-seq signal for each target gene

## Extended Data 4

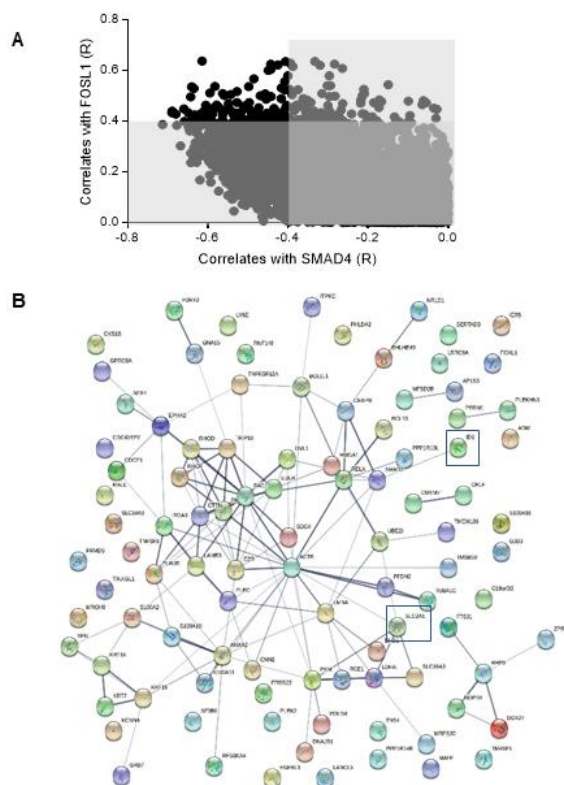

### Extended Data 4: Rho/Rac centric network of genes is correlated with FOSL1 and SMAD4 expression

*Related to Figure 4*

- A) Values of gene-gene correlations of each gene with FOSL1 (y) or SMAD4 (x) across TCGA Pancreatic cancer cohort. Genes significantly correlated with FOSL1 and inversely correlated with SMAD4 are in the unshaded quadrant
- B) String-db network of significant genes from S3B. Genes that scored in the colonization screen are boxed
